# Supplementary material
Source: PubMed Central journal article supplement (PMC3126538)
Supplement: supp_85_13_6453__4.pdf [file supp_85_13_6453__4.pdf]

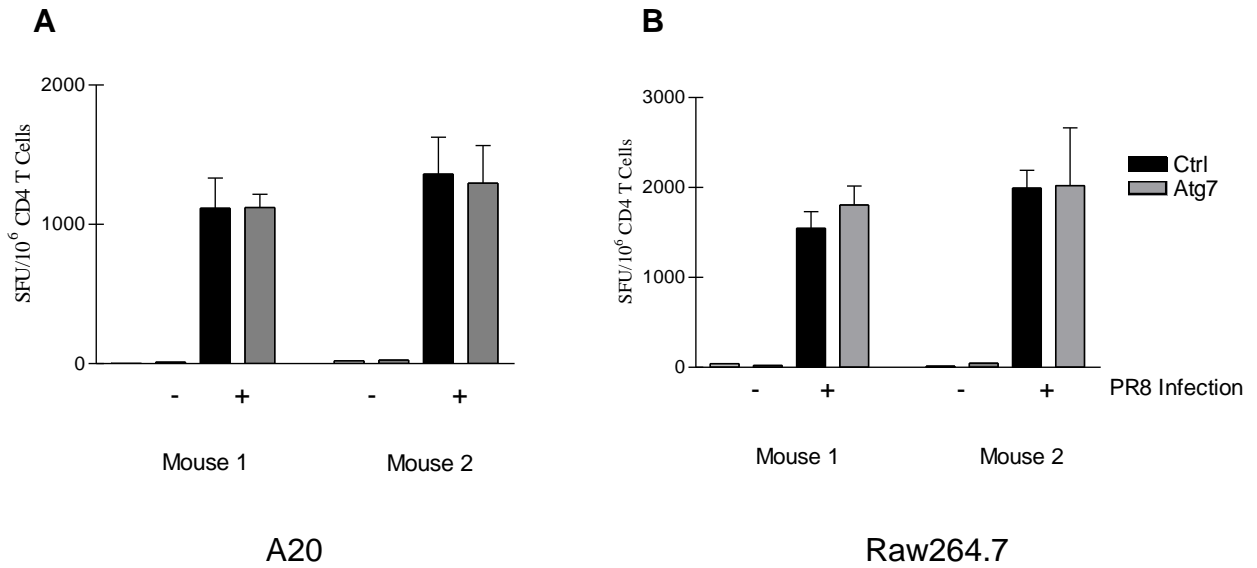

Supplementary Figure 4. Inhibition of autophagy in the professional antigen presenting cell lines A20 or Raw264.7 does not impact global MHC class II presentation. A20 (A) or Raw264.7 (B) cell lines were transfected with indicated siRNA, harvested at optimally determined time points, and infected with PR8 (4-50HAU/10<sup>6</sup> cells). Infected APCs were cultured with CD4<sup>+</sup> T cells isolated from splenocytes of mice primed intranasally with PR8 in an IFN- $\gamma$  ELISpot assay. Figures are representative of at least 3 independent experiments.
